# Supplementary material for: The Influence of Classroom Size and Window View on Young Children’s Executive Functions and Physiological Responses, Based on VR Technology
Source: MDPI journal article supplement (doi:10.3390/bs13110936), 2023-11-16
Supplement: s1 [file s1]

Supplementary material 1. Floor plans for VR conditions: (a) large classroom (also for nature- and built-view conditions); (b): small classroom

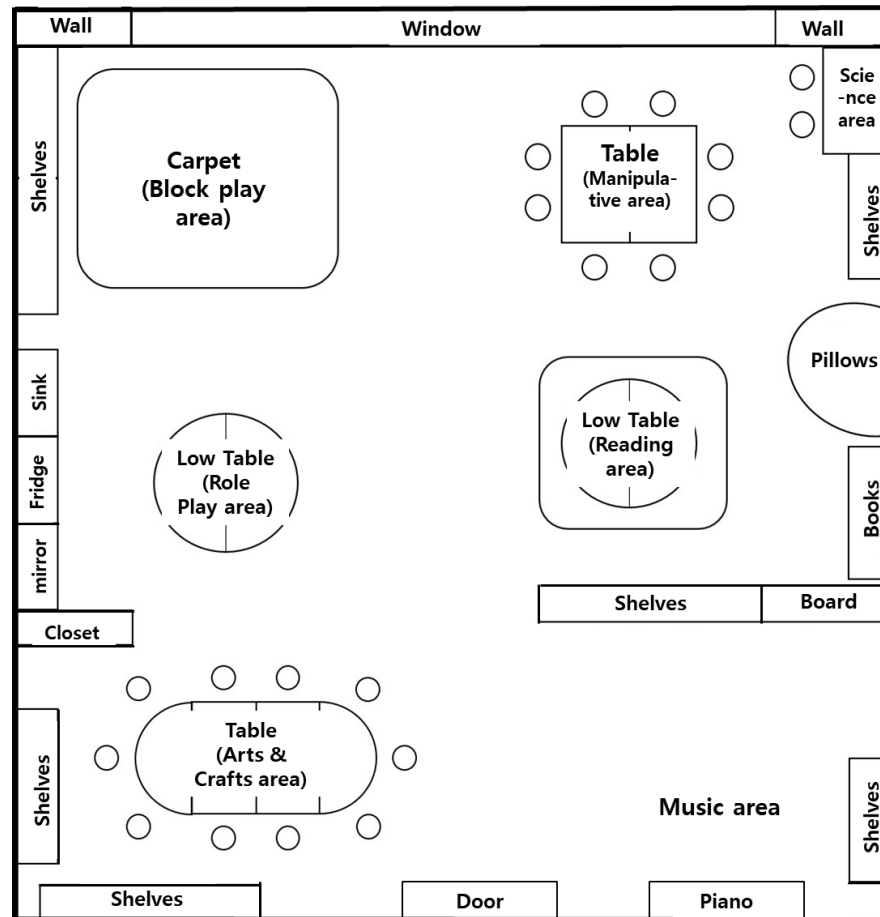

(a)

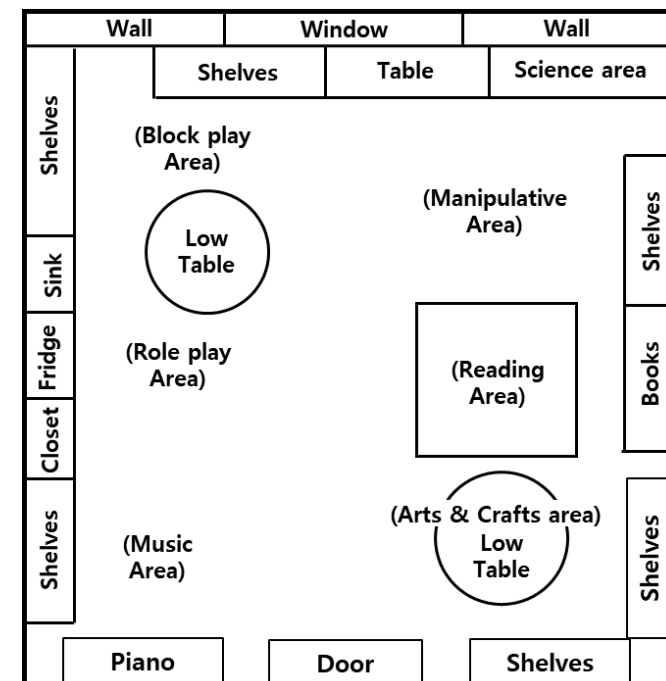

(b)
